# Supplementary material for: The Impact of Facility Surgical Caseload Volumes on Survival Outcomes in Patients Undergoing Radical Cystectomy
Source: MDPI journal article supplement (doi:10.3390/cancers14235984), 2022-12-03
Supplement: s1 [file s1]

# Supplementary Material: The Impact of Facility Surgical Caseload Volumes on Survival Outcomes in Patients Undergoing Radical Cystectomy

Giovanni E. Cacciamani <sup>1,†</sup>, Afsaneh Barzi <sup>2,†</sup>, Michael B. Eppler <sup>1</sup>, Primo N. Lara Jr. <sup>3</sup>, Chong-Xian Pan <sup>4</sup>, Sumeet K. Bhanvadia <sup>1</sup>, Parkash Gill <sup>5</sup>, Monish Aron <sup>1</sup>, Inderbir Gill <sup>1</sup> and Sarmad Sadeghi <sup>6,\*</sup>

- <sup>1</sup> Institute of Urology, USC Keck School of Medicine, Norris Comprehensive Cancer Center, University of Southern California, Los Angeles, CA 90033, USA
  - <sup>2</sup> City of Hope Comprehensive Cancer Center, Department of Medical Oncology & Therapeutics Research, Duarte, CA 91010, USA
  - <sup>3</sup> UC Davis Comprehensive Cancer Center, 4501 X Street, Sacramento, CA 95817, USA
  - <sup>4</sup> Department of Medicine, Harvard Medical School, West Roxbury, MA 02132, USA
  - <sup>5</sup> Department of Medicine, USC Norris Comprehensive Cancer Center, University of Southern California, Los Angeles, CA 90033, USA
  - <sup>6</sup> Norris Cancer Hospital and Clinics Norris Comprehensive Cancer Center, University of Southern California, Los Angeles, CA 90033, USA
- \* Correspondence: sarmad.sadeghi@usc.edu; Tel.: +323-865-0553
- † These authors contributed equally to this work.

**Table 3: Disease and treatment characteristics by volume group.**

\* ni: neoadjuvant chemo indicated. ng: neoadjuvant chemo given. ai: adjuvant chemo indicated. ag: adjuvant chemo given. (0) no, (1) yes.

\*\* These are patients who received neoadjuvant chemo without a clear indication, but post operatively based on pathology findings would have qualified for adjuvant chemo.

|                                                                | FASC          |                |                 |                |         | FAC           |                  |                  |                |         |
|----------------------------------------------------------------|---------------|----------------|-----------------|----------------|---------|---------------|------------------|------------------|----------------|---------|
|                                                                | 1             | 2              | 3               | 4              | p-value | 1             | 2                | 3                | 4              | p-value |
|                                                                | <50th, [0-2]  | 50-74th, [3-5] | 75-89th, [6-11] | 90th+, [12+]   |         | <50th, [0-28] | 50-74th, [29-47] | 75-89th, [48-70] | 90th+, [71+]   |         |
| <b>Radiation Surgery Sequence at any CoC Facility</b>          |               |                |                 |                |         |               |                  |                  |                |         |
| No radiation therapy and/or surgical procedures                | 2655 (94.7%)  | 4378 (95.5%)   | 6151 (96.8%)    | 13292 (98.2%)  | <0.001  | 3631 (94.9%)  | 4831 (96.4%)     | 6422 (97.1%)     | 11592 (98.1%)  | <0.001  |
| Radiation therapy before surgery                               | 14 (0.5%)     | 18 (0.4%)      | 19 (0.3%)       | 32 (0.2%)      |         | 19 (0.5%)     | 18 (0.4%)        | 16 (0.2%)        | 30 (0.3%)      |         |
| Radiation therapy after surgery                                | 117 (4.2%)    | 157 (3.4%)     | 157 (2.5%)      | 163 (1.2%)     |         | 151 (3.9%)    | 136 (2.7%)       | 142 (2.1%)       | 165 (1.4%)     |         |
| Radiation therapy both before and after surgery                | 0 (0.0%)      | 1 (<1%)        | 2 (<1%)         | 4 (<1%)        |         | 1 (<1%)       | 0 (0.0%)         | 1 (<1%)          | 5 (<1%)        |         |
| Intraoperative radiation therapy                               | 0 (0.0%)      | 0 (0.0%)       | 0 (0.0%)        | 2 (<1%)        |         | 0 (0.0%)      | 0 (0.0%)         | 0 (0.0%)         | 2 (<1%)        |         |
| Sequence unknown                                               | 18 (0.6%)     | 30 (0.7%)      | 26 (0.4%)       | 36 (0.3%)      |         | 26 (0.7%)     | 26 (0.5%)        | 30 (0.5%)        | 28 (0.2%)      |         |
| <b>Surgical Margins Status at any CoC Facility- summarized</b> |               |                |                 |                |         |               |                  |                  |                |         |
| Negative                                                       | 2219 (79.1%)  | 3842 (83.8%)   | 5428 (85.4%)    | 11842 (87.5%)  | <0.001  | 3171 (82.8%)  | 4261 (85.0%)     | 5552 (84.0%)     | 10347 (87.5%)  | <0.001  |
| Positive                                                       | 295 (10.5%)   | 434 (9.5%)     | 629 (9.9%)      | 1155 (8.5%)    |         | 397 (10.4%)   | 462 (9.2%)       | 563 (8.5%)       | 1091 (9.2%)    |         |
| Unknown                                                        | 290 (10.3%)   | 308 (6.7%)     | 298 (4.7%)      | 532 (3.9%)     |         | 260 (6.8%)    | 288 (5.7%)       | 496 (7.5%)       | 384 (3.2%)     |         |
| <b>Lymph Node Dissection Status</b>                            |               |                |                 |                |         |               |                  |                  |                |         |
| 0 nodes examined                                               | 548 (19.8%)   | 672 (14.7%)    | 714 (11.3%)     | 1026 (7.6%)    | <0.001  | 3171 (82.8%)  | 4261 (85.0%)     | 5552 (84.0%)     | 10347 (87.5%)  | <0.001  |
| <10 nodes examined                                             | 1021 (36.9%)  | 1905 (41.8%)   | 2540 (40.1%)    | 3285 (24.3%)   |         | 1437 (37.8%)  | 1863 (37.4%)     | 2228 (33.9%)     | 3223 (27.3%)   |         |
| 10-14 nodes examined                                           | 401 (14.5%)   | 782 (17.1%)    | 1179 (18.6%)    | 2351 (17.4%)   |         | 646 (17.0%)   | 831 (16.7%)      | 1112 (16.9%)     | 2124 (18.0%)   |         |
| 15-29 nodes examined                                           | 523 (18.9%)   | 837 (18.4%)    | 1369 (21.6%)    | 4667 (34.6%)   |         | 768 (20.2%)   | 1129 (22.7%)     | 1585 (24.1%)     | 3914 (33.2%)   |         |
| 30+ nodes examined                                             | 148 (5.3%)    | 215 (4.7%)     | 368 (5.8%)      | 2037 (15.1%)   |         | 209 (5.5%)    | 379 (7.6%)       | 656 (10.0%)      | 1524 (12.9%)   |         |
| Unknown                                                        | 127 (4.6%)    | 150 (3.3%)     | 160 (2.5%)      | 136 (1.0%)     |         | 131 (3.4%)    | 154 (3.1%)       | 159 (2.4%)       | 129 (1.1%)     |         |
| <b>Treatment Subgroup *</b>                                    |               |                |                 |                |         |               |                  |                  |                |         |
| ni(0) ng(0) ai(0) ag(0)                                        | 590 (21.0%)   | 1106 (24.1%)   | 1567 (24.7%)    | 3283 (24.3%)   | <0.001  | 931 (24.3%)   | 1217 (24.3%)     | 1611 (24.4%)     | 2787 (23.6%)   | <0.001  |
| ni(0) ng(0) ai(0) ag(1)                                        | 107 (3.8%)    | 181 (3.9%)     | 222 (3.5%)      | 461 (3.4%)     |         | 124 (3.2%)    | 175 (3.5%)       | 294 (4.4%)       | 378 (3.2%)     |         |
| ni(0) ng(0) ai(1) ag(0)                                        | 259 (9.2%)    | 424 (9.2%)     | 659 (10.4%)     | 1287 (9.5%)    |         | 383 (10.0%)   | 466 (9.3%)       | 643 (9.7%)       | 1137 (9.6%)    |         |
| ni(0) ng(0) ai(1) ag(1)                                        | 203 (7.2%)    | 298 (6.5%)     | 361 (5.7%)      | 605 (4.5%)     |         | 254 (6.6%)    | 320 (6.4%)       | 383 (5.8%)       | 510 (4.3%)     |         |
| ni(0) ng(1) ai(0) ag(0)                                        | 49 (1.7%)     | 81 (1.8%)      | 136 (2.1%)      | 416 (3.1%)     |         | 67 (1.8%)     | 89 (1.8%)        | 158 (2.4%)       | 368 (3.1%)     |         |
| ni(1) ng(0) ai(0) ag(0)                                        | 441 (15.7%)   | 693 (15.1%)    | 983 (15.5%)     | 1851 (13.7%)   |         | 581 (15.2%)   | 778 (15.5%)      | 974 (14.7%)      | 1635 (13.8%)   |         |
| ni(1) ng(0) ai(0) ag(1)                                        | 126 (4.5%)    | 167 (3.6%)     | 233 (3.7%)      | 445 (3.3%)     |         | 136 (3.6%)    | 179 (3.6%)       | 223 (3.4%)       | 433 (3.7%)     |         |
| ni(1) ng(0) ai(1) ag(0)                                        | 397 (14.2%)   | 695 (15.2%)    | 959 (15.1%)     | 1976 (14.6%)   |         | 562 (14.7%)   | 769 (15.3%)      | 951 (14.4%)      | 1745 (14.8%)   |         |
| ni(1) ng(0) ai(1) ag(1)                                        | 333 (11.9%)   | 461 (10.1%)    | 638 (10.0%)     | 1058 (7.8%)    |         | 417 (10.9%)   | 517 (10.3%)      | 608 (9.2%)       | 948 (8.0%)     |         |
| ni(1) ng(1) ai(0) ag(0)                                        | 142 (5.1%)    | 199 (4.3%)     | 260 (4.1%)      | 888 (6.6%)     |         | 173 (4.5%)    | 221 (4.4%)       | 302 (4.6%)       | 793 (6.7%)     |         |
| ni(1) ng(1) ai(1) ag(0)                                        | 97 (3.5%)     | 149 (3.3%)     | 195 (3.1%)      | 830 (6.1%)     |         | 120 (3.1%)    | 160 (3.2%)       | 264 (4.0%)       | 727 (6.1%)     |         |
| ni(0) ng(1) ai(0/1) ag(0)- ret                                 | 60 (2.1%)     | 130 (2.8%)     | 142 (2.2%)      | 429 (3.2%)     |         | 80 (2.1%)     | 120 (2.4%)       | 200 (3.0%)       | 361 (3.1%)     |         |
| <b>Multiagent chemotherapy as first course</b>                 |               |                |                 |                |         |               |                  |                  |                |         |
| No chemo                                                       | 1476 (58.0%)  | 2535 (61.4%)   | 3642 (63.3%)    | 7461 (60.8%)   | <0.001  | 2162 (62.4%)  | 2815 (62.3%)     | 3661 (61.4%)     | 6476 (60.2%)   | <0.001  |
| Multiagent chemotherapy administered                           | 871 (34.2%)   | 1299 (31.5%)   | 1718 (29.9%)    | 4090 (33.3%)   |         | 1047 (30.2%)  | 1427 (31.6%)     | 1887 (31.6%)     | 3617 (33.6%)   |         |
| Single agent chemotherapy administered                         | 109 (4.3%)    | 177 (4.3%)     | 212 (3.7%)      | 380 (3.1%)     |         | 150 (4.3%)    | 162 (3.6%)       | 215 (3.6%)       | 351 (3.3%)     |         |
| Unknown number of agents administered                          | 90 (3.5%)     | 115 (2.8%)     | 181 (3.1%)      | 349 (2.8%)     |         | 106 (3.1%)    | 114 (2.5%)       | 200 (3.4%)       | 315 (2.9%)     |         |
| <b>90 Day Mortality 0: Patient alive at 90 days</b>            |               |                |                 |                |         |               |                  |                  |                |         |
| No distant met at diagnosis                                    | 2804 (100.0%) | 4584 (100.0%)  | 6355 (100.0%)   | 13529 (100.0%) |         | 3828 (100.0%) | 5011 (100.0%)    | 6611 (100.0%)    | 11822 (100.0%) |         |
| Urothelial carcinoma                                           | 2804 (100.0%) | 4584 (100.0%)  | 6355 (100.0%)   | 13529 (100.0%) |         | 3828 (100.0%) | 5011 (100.0%)    | 6611 (100.0%)    | 11822 (100.0%) |         |
| Pathologic T2 or higher status                                 | 2106 (85.3%)  | 3469 (83.2%)   | 4703 (81.0%)    | 9320 (73.5%)   | <0.001  | 2859 (82.5%)  | 3770 (82.4%)     | 4694 (79.0%)     | 8275 (74.2%)   | <0.001  |
| Clinical T2 or higher status                                   | 1495 (78.6%)  | 2299 (76.6%)   | 3193 (76.4%)    | 6901 (71.6%)   | <0.001  | 1938 (77.1%)  | 2563 (77.3%)     | 3239 (74.1%)     | 6148 (72.2%)   | <0.001  |
| Pathologic T3 or higher status                                 | 1262 (51.1%)  | 2000 (48.0%)   | 2790 (48.0%)    | 5723 (45.1%)   | <0.001  | 1707 (49.3%)  | 2190 (47.9%)     | 2819 (47.4%)     | 5059 (45.4%)   | <0.001  |
| Pathologic node+ status                                        | 622 (23.2%)   | 964 (21.7%)    | 1337 (21.5%)    | 2932 (22.1%)   | 0.36    | 860 (23.2%)   | 1069 (22.0%)     | 1373 (21.4%)     | 2553 (22.0%)   | 0.24    |
| Clinical node+ status                                          | 164 (5.9%)    | 245 (5.4%)     | 295 (4.7%)      | 627 (4.6%)     | 0.016   | 233 (6.1%)    | 252 (5.0%)       | 319 (4.9%)       | 527 (4.5%)     | <0.001  |
| <b>N</b>                                                       | <b>2804</b>   | <b>4584</b>    | <b>6355</b>     | <b>13529</b>   |         | <b>3828</b>   | <b>5011</b>      | <b>6611</b>      | <b>11822</b>   |         |

**Figure S1. Disease and Treatment Characteristics by Volume Group.**

**Table S1.** Results by Facility Volume Groups.

|                             | Volume Groups   |                   |                    |                 |         |                |                  |                     |                     |                 |         |
|-----------------------------|-----------------|-------------------|--------------------|-----------------|---------|----------------|------------------|---------------------|---------------------|-----------------|---------|
|                             | FASC            |                   |                    |                 |         |                | FAC              |                     |                     |                 |         |
| Variable                    | 1: <50th, [0-2] | 2: 50-74th, [3-5] | 3: 75-89th, [6-11] | 4: 90th+, [12+] | P-value | All            | 1: <50th, [0-28] | 2: 50-74th, [29-47] | 3: 75-89th, [48-70] | 4: 90th+, [71+] | P-value |
| N                           | 2804            | 4584              | 6355               | 13529           |         | 27,272         | 3828             | 5011                | 6611                | 11822           |         |
| Age groups                  |                 |                   |                    |                 |         |                |                  |                     |                     |                 |         |
| 1: <50                      | 109 (3.9%)      | 240 (5.2%)        | 286 (4.5%)         | 707 (5.2%)      | 0.010   | 1,342 (4.9%)   | 231 (6.0%)       | 236 (4.7%)          | 340 (5.1%)          | 535 (4.5%)      | 0.001   |
| 2: 50-64                    | 889 (31.7%)     | 1395 (30.4%)      | 1971 (31.0%)       | 4357 (32.2%)    |         | 8,612 (31.6%)  | 1264 (33.0%)     | 1582 (31.6%)        | 2062 (31.2%)        | 3704 (31.3%)    |         |
| 3: 65-74                    | 1021 (36.4%)    | 1673 (36.5%)      | 2264 (35.6%)       | 4711 (34.8%)    |         | 9,669 (35.5%)  | 1332 (34.8%)     | 1810 (36.1%)        | 2365 (35.8%)        | 4162 (35.2%)    |         |
| 4: 75+                      | 785 (28.0%)     | 1276 (27.8%)      | 1834 (28.9%)       | 3754 (27.7%)    |         | 7,649 (28.0%)  | 1001 (26.1%)     | 1383 (27.6%)        | 1844 (27.9%)        | 3421 (28.9%)    |         |
| Sex                         |                 |                   |                    |                 |         | 0 (0.0%)       |                  |                     |                     |                 |         |
| 1: Male                     | 2102 (75.0%)    | 3491 (76.2%)      | 4863 (76.5%)       | 10515 (77.7%)   | 0.005   | 20,971 (76.9%) | 2887 (75.4%)     | 3836 (76.6%)        | 5041 (76.3%)        | 9207 (77.9%)    | 0.005   |
| 2: Female                   | 702 (25.0%)     | 1093 (23.8%)      | 1492 (23.5%)       | 3014 (22.3%)    |         | 6,301 (23.1%)  | 941 (24.6%)      | 1175 (23.4%)        | 1570 (23.7%)        | 2615 (22.1%)    |         |
| Race                        |                 |                   |                    |                 |         |                |                  |                     |                     |                 |         |
| White                       | 2570 (92.3%)    | 4209 (92.3%)      | 5815 (92.5%)       | 12289 (92.1%)   | 0.028   | 24,883 (91.2%) | 3436 (90.3%)     | 4587 (92.4%)        | 6092 (93.0%)        | 10768 (92.4%)   | <0.001  |
| Black                       | 156 (5.6%)      | 259 (5.7%)        | 366 (5.8%)         | 727 (5.4%)      |         | 1,508 (5.5%)   | 277 (7.3%)       | 283 (5.7%)          | 328 (5.0%)          | 620 (5.3%)      |         |
| Other                       | 58 (2.1%)       | 91 (2.0%)         | 107 (1.7%)         | 331 (2.5%)      |         | 587 (2.2%)     | 90 (2.4%)        | 95 (1.9%)           | 131 (2.0%)          | 271 (2.3%)      |         |
| Primary Payor               |                 |                   |                    |                 |         |                |                  |                     |                     |                 |         |
| 0: Not Insured              | 90 (3.2%)       | 188 (4.1%)        | 223 (3.5%)         | 299 (2.2%)      | <0.001  | 800 (2.9%)     | 201 (5.3%)       | 180 (3.6%)          | 173 (2.6%)          | 246 (2.1%)      | <0.001  |
| 1: Private Insurance        | 869 (31.0%)     | 1449 (31.6%)      | 1989 (31.3%)       | 4590 (33.9%)    |         | 8,897 (32.6%)  | 1144 (29.9%)     | 1570 (31.3%)        | 2138 (32.3%)        | 4045 (34.2%)    |         |
| 2: Medicaid                 | 141 (5.0%)      | 208 (4.5%)        | 271 (4.3%)         | 524 (3.9%)      |         | 1,144 (4.2%)   | 234 (6.1%)       | 231 (4.6%)          | 255 (3.9%)          | 424 (3.6%)      |         |
| 3: Medicare                 | 1630 (58.1%)    | 2657 (58.0%)      | 3722 (58.6%)       | 7633 (56.4%)    |         | 15,642 (57.4%) | 2129 (55.6%)     | 2918 (58.2%)        | 3729 (56.4%)        | 6866 (58.1%)    |         |
| 4: Other Government         | 37 (1.3%)       | 32 (0.7%)         | 55 (0.9%)          | 147 (1.1%)      |         | 271 (1.0%)     | 45 (1.2%)        | 52 (1.0%)           | 62 (0.9%)           | 112 (0.9%)      |         |
| 9: Insurance Status Unknown | 37 (1.3%)       | 50 (1.1%)         | 95 (1.5%)          | 336 (2.5%)      |         | 518 (1.9%)     | 75 (2.0%)        | 60 (1.2%)           | 254 (3.8%)          | 129 (1.1%)      |         |
| Charlson-Deyo Score         |                 |                   |                    |                 |         |                |                  |                     |                     |                 |         |
| 0                           | 1973 (70.4%)    | 3230 (70.5%)      | 4316 (67.9%)       | 9744 (72.0%)    | <0.001  | 19,263 (70.6%) | 2698 (70.5%)     | 3489 (69.6%)        | 4699 (71.1%)        | 8377 (70.9%)    | 0.32    |

|                                                               |              |              |              |               |            |                   |                 |                 |                 |                  |            |
|---------------------------------------------------------------|--------------|--------------|--------------|---------------|------------|-------------------|-----------------|-----------------|-----------------|------------------|------------|
| 1                                                             | 635 (22.6%)  | 1040 (22.7%) | 1549 (24.4%) | 2922 (21.6%)  |            | 6,146<br>(22.5%)  | 869<br>(22.7%)  | 1154<br>(23.0%) | 1447<br>(21.9%) | 2676<br>(22.6%)  |            |
| 2                                                             | 196 (7.0%)   | 314 (6.8%)   | 490 (7.7%)   | 863 (6.4%)    |            | 1,863<br>(6.8%)   | 261<br>(6.8%)   | 368 (7.3%)      | 465 (7.0%)      | 769<br>(6.5%)    |            |
| <b>Facility Type</b>                                          |              |              |              |               |            |                   |                 |                 |                 |                  |            |
| 1: Community Cancer Program                                   | 984 (35.2%)  | 586 (12.9%)  | 142 (2.2%)   | 15 (0.1%)     | <0.0<br>01 | 1,727<br>(6.3%)   | 1321<br>(34.8%) | 323 (6.5%)      | 48 (0.7%)       | 35 (0.3%)        | <0.0<br>01 |
| 2: Comprehensive Community Cancer Program                     | 1506 (53.9%) | 2795 (61.3%) | 3303 (52.2%) | 1101 (8.2%)   |            | 8,705<br>(31.9%)  | 1653<br>(43.5%) | 2950<br>(59.2%) | 2613<br>(39.7%) | 1489<br>(12.7%)  |            |
| 3: Academic/Research Program                                  | 266 (9.5%)   | 932 (20.5%)  | 2175 (34.4%) | 10766 (80.1%) |            | 14,139<br>(51.8%) | 794<br>(20.9%)  | 1587<br>(31.9%) | 3441<br>(52.3%) | 8317<br>(70.8%)  |            |
| 4: Integrated Network Cancer Program                          | 38 (1.4%)    | 244 (5.4%)   | 702 (11.1%)  | 1551 (11.5%)  |            | 2,535<br>(9.3%)   | 33 (0.9%)       | 119 (2.4%)      | 475 (7.2%)      | 1908<br>(16.2%)  |            |
| <b>Radiation Surgery Sequence at any CoC Facility</b>         |              |              |              |               |            |                   |                 |                 |                 |                  |            |
| 0: No radiation therapy and/or surgical procedures            | 2655 (94.7%) | 4378 (95.5%) | 6151 (96.8%) | 13292 (98.2%) | <0.0<br>01 | 26,476<br>(97.1%) | 3631<br>(94.9%) | 4831<br>(96.4%) | 6422<br>(97.1%) | 11592<br>(98.1%) | <0.0<br>01 |
| 2: Radiation therapy before surgery                           | 14 (0.5%)    | 18 (0.4%)    | 19 (0.3%)    | 32 (0.2%)     |            | 83 (0.3%)         | 19 (0.5%)       | 18 (0.4%)       | 16 (0.2%)       | 30 (0.3%)        |            |
| 3: Radiation therapy after surgery                            | 117 (4.2%)   | 157 (3.4%)   | 157 (2.5%)   | 163 (1.2%)    |            | 594<br>(2.2%)     | 151<br>(3.9%)   | 136 (2.7%)      | 142 (2.1%)      | 165<br>(1.4%)    |            |
| 4: Radiation therapy both before and after surgery            | 0 (0.0%)     | 1 (<1%)      | 2 (<1%)      | 4 (<1%)       |            | 7 (0.0%)          | 1 (<1%)         | 0 (0.0%)        | 1 (<1%)         | 5 (<1%)          |            |
| 5: Intraoperative radiation therapy                           | 0 (0.0%)     | 0 (0.0%)     | 0 (0.0%)     | 2 (<1%)       |            | 2 (0.0%)          | 0 (0.0%)        | 0 (0.0%)        | 0 (0.0%)        | 2 (<1%)          |            |
| 9: Sequence unknown                                           | 18 (0.6%)    | 30 (0.7%)    | 26 (0.4%)    | 36 (0.3%)     |            | 110<br>(0.4%)     | 26 (0.7%)       | 26 (0.5%)       | 30 (0.5%)       | 28 (0.2%)        |            |
| <b>Surgical Margins Status at any CoC Facility-summarized</b> |              |              |              |               |            |                   |                 |                 |                 |                  |            |
| 0: Negative                                                   | 2219 (79.1%) | 3842 (83.8%) | 5428 (85.4%) | 11842 (87.5%) | <0.0<br>01 | 23,331<br>(85.5%) | 3171<br>(82.8%) | 4261<br>(85.0%) | 5552<br>(84.0%) | 10347<br>(87.5%) | <0.0<br>01 |
| 1: Positive                                                   | 295 (10.5%)  | 434 (9.5%)   | 629 (9.9%)   | 1155 (8.5%)   |            | 2,513<br>(9.2%)   | 397<br>(10.4%)  | 462 (9.2%)      | 563 (8.5%)      | 1091<br>(9.2%)   |            |

|                                                                                                  |              |              |              |               |        |                |              |              |              |               |  |
|--------------------------------------------------------------------------------------------------|--------------|--------------|--------------|---------------|--------|----------------|--------------|--------------|--------------|---------------|--|
| 2: Unknown                                                                                       | 290 (10.3%)  | 308 (6.7%)   | 298 (4.7%)   | 532 (3.9%)    |        | 1,428 (5.2%)   | 260 (6.8%)   | 288 (5.7%)   | 496 (7.5%)   | 384 (3.2%)    |  |
| Surgical Margins Status at any CoC Facility- detailed                                            |              |              |              |               |        |                |              |              |              |               |  |
| 0: No residual tumor All margins are grossly and microscopically negative                        | 2219 (79.1%) | 3842 (83.8%) | 5428 (85.4%) | 11842 (87.5%) | <0.001 | 23,331 (85.5%) | 3171 (82.8%) | 4261 (85.0%) | 5552 (84.0%) | 10347 (87.5%) |  |
| 1: Residual tumor, NOS Involvement is indicated, but not otherwise specified                     | 136 (4.9%)   | 165 (3.6%)   | 212 (3.3%)   | 388 (2.9%)    |        | 901 (3.3%)     | 158 (4.1%)   | 184 (3.7%)   | 209 (3.2%)   | 350 (3.0%)    |  |
| 2: Microscopic residual tumor Cannot be seen by the naked eye                                    | 135 (4.8%)   | 241 (5.3%)   | 381 (6.0%)   | 708 (5.2%)    |        | 1,465 (5.4%)   | 211 (5.5%)   | 247 (4.9%)   | 328 (5.0%)   | 679 (5.7%)    |  |
| 3: Macroscopic residual tumor, Gross tumor of the primary site which is visible to the naked eye | 24 (0.9%)    | 28 (0.6%)    | 36 (0.6%)    | 59 (0.4%)     |        | 147 (0.5%)     | 28 (0.7%)    | 31 (0.6%)    | 26 (0.4%)    | 62 (0.5%)     |  |
| 7: Margins not evaluable, Cannot be assessed (indeterminate)                                     | 123 (4.4%)   | 146 (3.2%)   | 142 (2.2%)   | 210 (1.6%)    |        | 621 (2.3%)     | 123 (3.2%)   | 124 (2.5%)   | 162 (2.5%)   | 212 (1.8%)    |  |
| 9: Unknown or not applicable                                                                     | 167 (6.0%)   | 162 (3.5%)   | 156 (2.5%)   | 322 (2.4%)    |        | 807 (3.0%)     | 137 (3.6%)   | 164 (3.3%)   | 334 (5.1%)   | 172 (1.5%)    |  |
| Lymph Node Dissection Status                                                                     |              |              |              |               |        |                |              |              |              |               |  |
| 0: 0 nodes examined                                                                              | 548 (19.8%)  | 672 (14.7%)  | 714 (11.3%)  | 1026 (7.6%)   | <0.001 | 23,331 (85.5%) | 3171 (82.8%) | 4261 (85.0%) | 5552 (84.0%) | 10347 (87.5%) |  |
| 1: <10 nodes examined                                                                            | 1021 (36.9%) | 1905 (41.8%) | 2540 (40.1%) | 3285 (24.3%)  |        | 8,751 (32.1%)  | 1437 (37.8%) | 1863 (37.4%) | 2228 (33.9%) | 3223 (27.3%)  |  |
| 2: 10-14 nodes examined                                                                          | 401 (14.5%)  | 782 (17.1%)  | 1179 (18.6%) | 2351 (17.4%)  |        | 4,713 (17.3%)  | 646 (17.0%)  | 831 (16.7%)  | 1112 (16.9%) | 2124 (18.0%)  |  |
| 3: 15-29 nodes examined                                                                          | 523 (18.9%)  | 837 (18.4%)  | 1369 (21.6%) | 4667 (34.6%)  |        | 7,396 (27.1%)  | 768 (20.2%)  | 1129 (22.7%) | 1585 (24.1%) | 3914 (33.2%)  |  |
| 4: 30+ nodes examined                                                                            | 148 (5.3%)   | 215 (4.7%)   | 368 (5.8%)   | 2037 (15.1%)  |        | 2,768 (10.1%)  | 209 (5.5%)   | 379 (7.6%)   | 656 (10.0%)  | 1524 (12.9%)  |  |
| 5: Unknown                                                                                       | 127 (4.6%)   | 150 (3.3%)   | 160 (2.5%)   | 136 (1.0%)    |        | 573 (2.1%)     | 131 (3.4%)   | 154 (3.1%)   | 159 (2.4%)   | 129 (1.1%)    |  |

| Treatment Cohort                                                                                                    |               |               |               |                   |            |                    |                  |                  |                  |                   |            |
|---------------------------------------------------------------------------------------------------------------------|---------------|---------------|---------------|-------------------|------------|--------------------|------------------|------------------|------------------|-------------------|------------|
| 0: ni(0) ng(0)<br>ai(0) ag(0)                                                                                       | 590 (21.0%)   | 1106 (24.1%)  | 1567 (24.7%)  | 3283 (24.3%)      | <0.0<br>01 | 6,546<br>(24.0%)   | 931<br>(24.3%)   | 1217<br>(24.3%)  | 1611<br>(24.4%)  | 2787<br>(23.6%)   | <0.0<br>01 |
| 1: ni(0) ng(0)<br>ai(0) ag(1)                                                                                       | 107 (3.8%)    | 181 (3.9%)    | 222 (3.5%)    | 461 (3.4%)        |            | 971<br>(3.6%)      | 124<br>(3.2%)    | 175 (3.5%)       | 294 (4.4%)       | 378<br>(3.2%)     |            |
| 2: ni(0) ng(0)<br>ai(1) ag(0)                                                                                       | 259 (9.2%)    | 424 (9.2%)    | 659 (10.4%)   | 1287 (9.5%)       |            | 2,629<br>(9.6%)    | 383<br>(10.0%)   | 466 (9.3%)       | 643 (9.7%)       | 1137<br>(9.6%)    |            |
| 3: ni(0) ng(0)<br>ai(1) ag(1)                                                                                       | 203 (7.2%)    | 298 (6.5%)    | 361 (5.7%)    | 605 (4.5%)        |            | 1,467<br>(5.4%)    | 254<br>(6.6%)    | 320 (6.4%)       | 383 (5.8%)       | 510<br>(4.3%)     |            |
| 4: ni(0) ng(1)<br>ai(0) ag(0)                                                                                       | 49 (1.7%)     | 81 (1.8%)     | 136 (2.1%)    | 416 (3.1%)        |            | 682<br>(2.5%)      | 67 (1.8%)        | 89 (1.8%)        | 158 (2.4%)       | 368<br>(3.1%)     |            |
| 8: ni(1) ng(0)<br>ai(0) ag(0)                                                                                       | 441 (15.7%)   | 693 (15.1%)   | 983 (15.5%)   | 1851 (13.7%)      |            | 3,968<br>(14.5%)   | 581<br>(15.2%)   | 778 (15.5%)      | 974 (14.7%)      | 1635<br>(13.8%)   |            |
| 9: ni(1) ng(0)<br>ai(0) ag(1)                                                                                       | 126 (4.5%)    | 167 (3.6%)    | 233 (3.7%)    | 445 (3.3%)        |            | 971<br>(3.6%)      | 136<br>(3.6%)    | 179 (3.6%)       | 223 (3.4%)       | 433<br>(3.7%)     |            |
| 10: ni(1) ng(0)<br>ai(1) ag(0)                                                                                      | 397 (14.2%)   | 695 (15.2%)   | 959 (15.1%)   | 1976 (14.6%)      |            | 4,027<br>(14.8%)   | 562<br>(14.7%)   | 769 (15.3%)      | 951 (14.4%)      | 1745<br>(14.8%)   |            |
| 11: ni(1) ng(0)<br>ai(1) ag(1)                                                                                      | 333 (11.9%)   | 461 (10.1%)   | 638 (10.0%)   | 1058 (7.8%)       |            | 2,490<br>(9.1%)    | 417<br>(10.9%)   | 517 (10.3%)      | 608 (9.2%)       | 948<br>(8.0%)     |            |
| 12: ni(1) ng(1)<br>ai(0) ag(0)                                                                                      | 142 (5.1%)    | 199 (4.3%)    | 260 (4.1%)    | 888 (6.6%)        |            | 1,489<br>(5.5%)    | 173<br>(4.5%)    | 221 (4.4%)       | 302 (4.6%)       | 793<br>(6.7%)     |            |
| 14: ni(1) ng(1)<br>ai(1) ag(0)                                                                                      | 97 (3.5%)     | 149 (3.3%)    | 195 (3.1%)    | 830 (6.1%)        |            | 1,271<br>(4.7%)    | 120<br>(3.1%)    | 160 (3.2%)       | 264 (4.0%)       | 727<br>(6.1%)     |            |
| 16: ni(0) ng(1)<br>ai(0/1) ag(0)- ret-<br>rospect                                                                   | 60 (2.1%)     | 130 (2.8%)    | 142 (2.2%)    | 429 (3.2%)        |            | 761<br>(2.8%)      | 80 (2.1%)        | 120 (2.4%)       | 200 (3.0%)       | 361<br>(3.1%)     |            |
| <b>Multiagent<br/>chemotherapy as<br/>first course</b>                                                              |               |               |               |                   |            |                    |                  |                  |                  |                   |            |
| 0: No chemo                                                                                                         | 1476 (58.0%)  | 2535 (61.4%)  | 3642 (63.3%)  | 7461 (60.8%)      | <0.0<br>01 | 15,114<br>(55.4%)  | 2162<br>(62.4%)  | 2815<br>(62.3%)  | 3661<br>(61.4%)  | 6476<br>(60.2%)   | <0.0<br>01 |
| 1: Multiagent<br>chemotherapy<br>administered                                                                       | 871 (34.2%)   | 1299 (31.5%)  | 1718 (29.9%)  | 4090 (33.3%)      |            | 7,978<br>(29.3%)   | 1047<br>(30.2%)  | 1427<br>(31.6%)  | 1887<br>(31.6%)  | 3617<br>(33.6%)   |            |
| 2: Single agent<br>chemotherapy<br>administered                                                                     | 109 (4.3%)    | 177 (4.3%)    | 212 (3.7%)    | 380 (3.1%)        |            | 878<br>(3.2%)      | 150<br>(4.3%)    | 162 (3.6%)       | 215 (3.6%)       | 351<br>(3.3%)     |            |
| 3: Unknown<br>number of agents<br>administered                                                                      | 90 (3.5%)     | 115 (2.8%)    | 181 (3.1%)    | 349 (2.8%)        |            | 735<br>(2.7%)      | 106<br>(3.1%)    | 114 (2.5%)       | 200 (3.4%)       | 315<br>(2.9%)     |            |
| <b>90 Day Mortality<br/>0: Patient alive,<br/>or died more<br/>than 90 days af-<br/>ter surgery per-<br/>formed</b> | 2804 (100.0%) | 4584 (100.0%) | 6355 (100.0%) | 13529<br>(100.0%) |            | 27,272<br>(100.0%) | 3828<br>(100.0%) | 5011<br>(100.0%) | 6611<br>(100.0%) | 11822<br>(100.0%) |            |

|                                |               |               |               |                |                 |                |               |               |                |              |        |
|--------------------------------|---------------|---------------|---------------|----------------|-----------------|----------------|---------------|---------------|----------------|--------------|--------|
| No distant met at diagnosis    | 2804 (100.0%) | 4584 (100.0%) | 6355 (100.0%) | 13529 (100.0%) | 27,272 (100.0%) | 3828 (100.0%)  | 5011 (100.0%) | 6611 (100.0%) | 11822 (100.0%) |              |        |
| Urothelial carcinoma           | 2804 (100.0%) | 4584 (100.0%) | 6355 (100.0%) | 13529 (100.0%) | 27,272 (100.0%) | 3828 (100.0%)  | 5011 (100.0%) | 6611 (100.0%) | 11822 (100.0%) |              |        |
| Pathologic T2 or higher status | 2106 (85.3%)  | 3469 (83.2%)  | 4703 (81.0%)  | 9320 (73.5%)   | <0.001          | 19,598 (71.9%) | 2859 (82.5%)  | 3770 (82.4%)  | 4694 (79.0%)   | 8275 (74.2%) | <0.001 |
| Clinical T2 or higher status   | 1495 (78.6%)  | 2299 (76.6%)  | 3193 (76.4%)  | 6901 (71.6%)   | <0.001          | 13,888 (50.9%) | 1938 (77.1%)  | 2563 (77.3%)  | 3239 (74.1%)   | 6148 (72.2%) | <0.001 |
| Pathologic T3 or higher status | 1262 (51.1%)  | 2000 (48.0%)  | 2790 (48.0%)  | 5723 (45.1%)   | <0.001          | 11,775 (43.2%) | 1707 (49.3%)  | 2190 (47.9%)  | 2819 (47.4%)   | 5059 (45.4%) | <0.001 |
| Pathologic node status         | 622 (23.2%)   | 964 (21.7%)   | 1337 (21.5%)  | 2932 (22.1%)   | 0.36            | 5,855 (21.5%)  | 860 (23.2%)   | 1069 (22.0%)  | 1373 (21.4%)   | 2553 (22.0%) | 0.24   |
| Clinical node status           | 164 (5.9%)    | 245 (5.4%)    | 295 (4.7%)    | 627 (4.6%)     | 0.01            | 1,331 (4.9%)   | 233 (6.1%)    | 252 (5.0%)    | 319 (4.9%)     | 527 (4.5%)   | <0.001 |
